# Supplementary material
Source: Research Square preprint supplement (doi:10.21203/rs.3.rs-9497970/v1)
Supplement: Supplementary file 1 [file 1507ab6f18c54514c949c791.docx]

**Supplementary Table 1.** Colony-forming ability of bacteria and yeast after 4-h and 24-h exposure to nanocomposites and respective positive controls (CTAB and CuSO4*5H2O) to bacteria and yeast in deionized water at 30oC. After exposure, cells (3μL) were transferred onto toxicant-free agarized growth medium. All experiments were performed in at least three independent replicates; images shown are representative.

| **Compound or material** | ***E. coli* ATCC 25922: 4-h**  **Concentrations: µg compound/mL *(µg Cu/mL)*** | ***E. coli* ATCC 25922: 24-h**  **Concentrations: µg compound/mL *(µg Cu/mL)*** |
| --- | --- | --- |
|  | 0 0.8 1.6 3.1 6.3 12.5 25 50 100 200  0 *(0.05) (0.09) (0.19) (0.4) (0.8) (1.5) (3) (6) (12)* | 0 0.8 1.6 3.1 6.3 12.5 25 50 100 200  0 *(0.05) (0.09) (0.19) (0.4) (0.8) (1.5) (3) (6) (12)* |
| [Cu(NH3)4]2+@SiO2 (5.5%) | 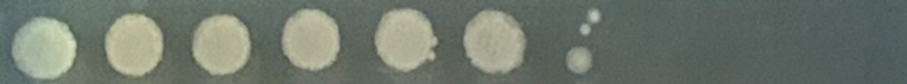 | 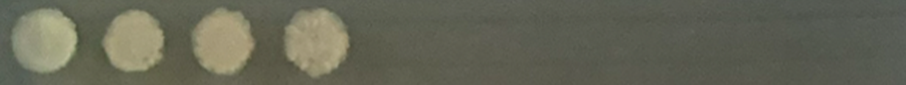 |
| [Cu(NH3)4]2+@SiO2 (5.5%)  24h leached | 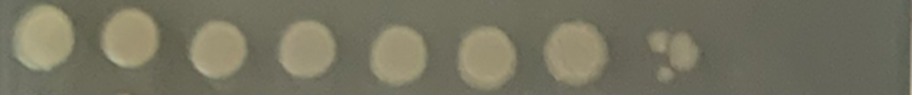 | 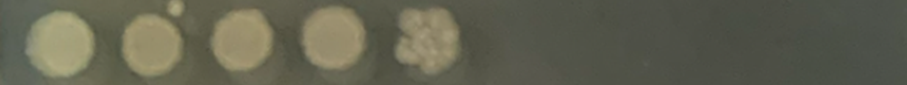 |
|  | 0 0.8 1.6 3.1 6.3 12.5 25 50 100 200  0 *(0.05) (0.1) (0.2) (0.4) (0.8) (1.6) (3.2) (6.4) (12.8)* | 0 0.8 1.6 3.1 6.3 12.5 25 50 100 200  0 *(0.05) (0.1) (0.2) (0.4) (0.8) (1.6) (3.2) (6.4) (12.8)* |
| CuxO@SiO2  (5.5%) | 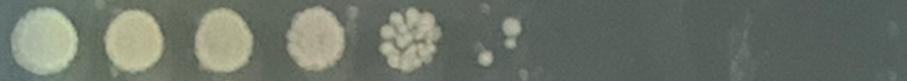 | 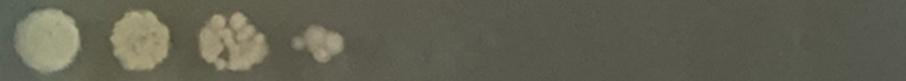 |
| CuxO@SiO2  (5.5%)  24h leached | 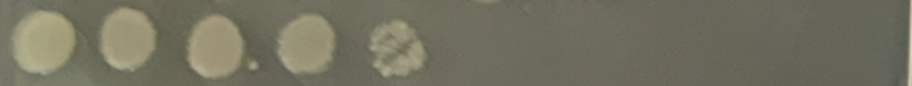 | 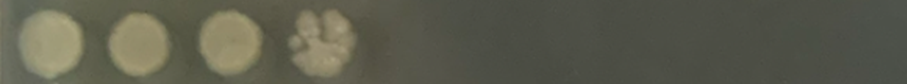 |
|  | 0 3.1 6.3 12.5 25 50 100 200 | 0 3.1 6.3 12.5 25 50 100 200 |
| SiO2 as prepared | 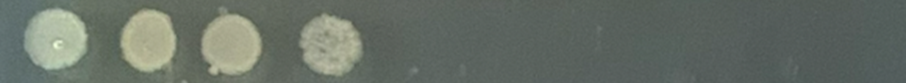 | 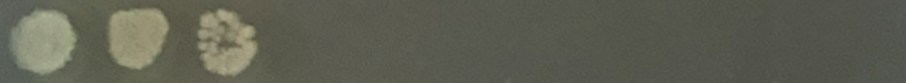 |
|  | 0 3.1 6.3 12.5 25 50 100 200 | 0 3.1 6.3 12.5 25 50 100 200 |
| SiO2 calcined | 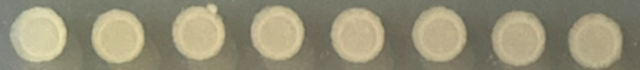 | 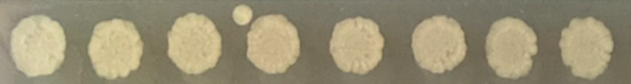 |
|  | 0 0.1 0.5 1.0 2.5 5 10 | 0 0.1 0.5 1.0 2.5 5 10 |
| CTAB | 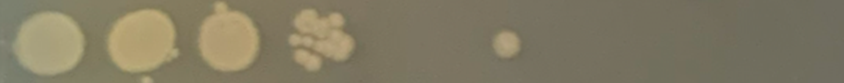 | 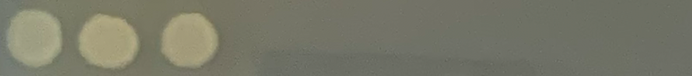 |
|  | 0 0.20 0.4 1.0 2.0 3.9 9.8 19.6 39.3  0 *(0.05) (0.1) (0.25) (0.5) (1.0) (2.5) (5.0) (10)* | 0 0.20 0.4 1.0 2.0 3.9 9.8 19.6 39.3  0 *(0.05) (0.1) (0.25) (0.5) (1.0) (2.5) (5.0) (10)* |
| CuSO4·5H2O | 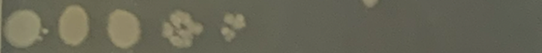 | 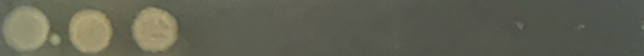 |

| **Compound or material** | ***P. aeruginosa* ATCC 27853: 4-h**  **Concentrations: µg compound/mL *(µg Cu/mL)*** | ***P. aeruginosa* ATCC 27853: 24-h**  **Concentrations: µg compound/mL *(µg Cu/mL)*** |
| --- | --- | --- |
|  | 0 0.8 1.6 3.1 6.3 12.5 25 50 100 200  0 *(0.05) (0.09) (0.19) (0.4) (0.8) (1.5) (3) (6) (12)* | 0 0.8 1.6 3.1 6.3 12.5 25 50 100 200  0 *(0.05) (0.09) (0.19) (0.4) (0.8) (1.5) (3) (6) (12)* |
| [Cu(NH3)4]2+@SiO2 (5.5%) | 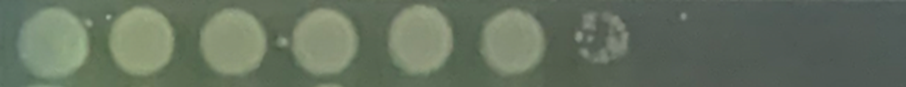 | 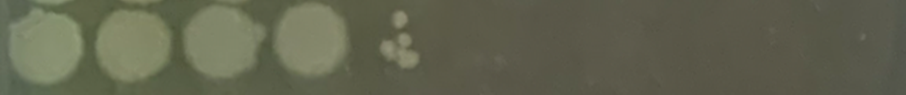 |
| [Cu(NH3)4]2+@SiO2 (5.5%)  24h leached | 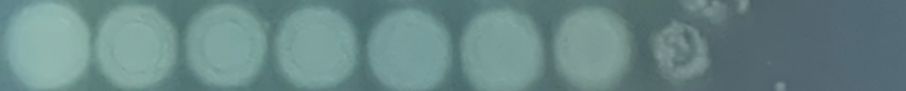 | 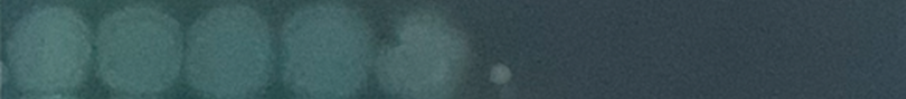 |
|  | 0 0.8 1.6 3.1 6.3 12.5 25 50 100 200  0 *(0.05) (0.1) (0.2) (0.4) (0.8) (1.6) (3.2) (6.4) (12.8)* | 0 0.8 1.6 3.1 6.3 12.5 25 50 100 200  0 *(0.05) (0.1) (0.2) (0.4) (0.8) (1.6) (3.2) (6.4) (12.8)* |
| CuxO@SiO2  (5.5%) | 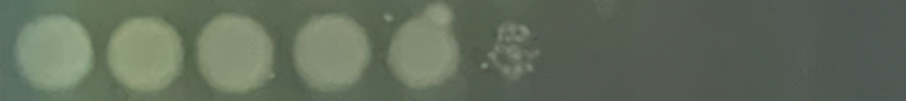 | 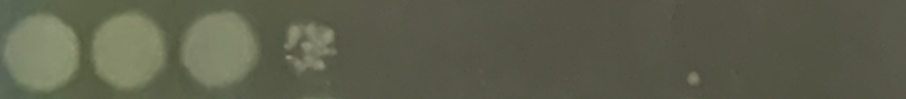 |
| CuxO@SiO2  (5.5%)  24h leached | 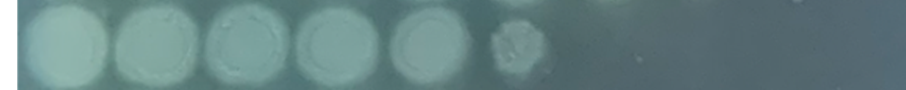 | 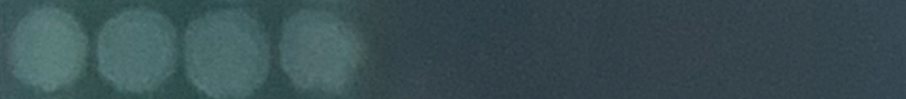 |
|  | 0 3.1 6.3 12.5 25 50 100 200 | 0 3.1 6.3 12.5 25 50 100 200 |
| SiO2 as prepared | 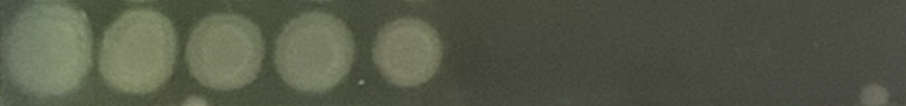 | 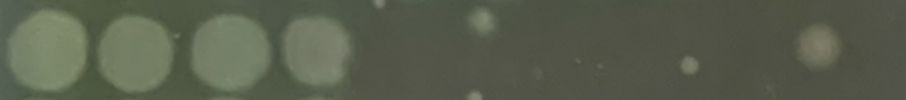 |
|  | 0 3.1 6.3 12.5 25 50 100 200 | 0 3.1 6.3 12.5 25 50 100 200 |
| SiO2 calcined | 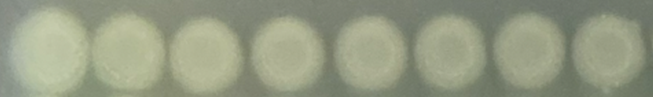 | 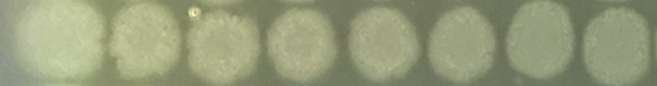 |
|  | 0 0.1 0.5 1.0 2.5 5 10 | 0 0.1 0.5 1.0 2.5 5 10 |
| CTAB | 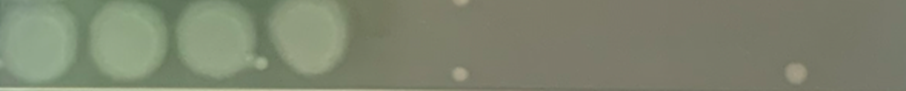 | 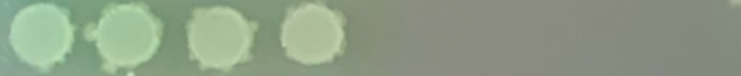 |
|  | 0 0.20 0.4 1.0 2.0 3.9 9.8 19.6 39.3  0 *(0.05) (0.1) (0.25) (0.5) (1.0) (2.5) (5.0) (10)* | 0 0.20 0.4 1.0 2.0 3.9 9.8 19.6 39.3  0 *(0.05) (0.1) (0.25) (0.5) (1.0) (2.5) (5.0) (10)* |
| CuSO4·5H2O | 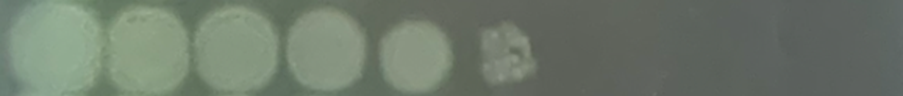 | 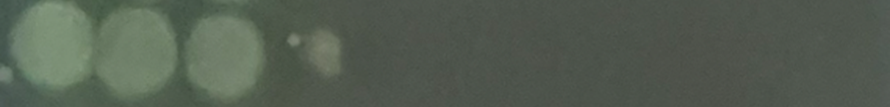 |

| **Compound or material** | ***S. aureus* ATCC 6538: 4-h**  **Concentrations: µg compound/mL *(µg Cu/mL)*** | ***S. aureus* ATCC 6538: 24-h**  **Concentrations: µg compound/mL *(µg Cu/mL)*** |
| --- | --- | --- |
|  | 0 0.8 1.6 3.1 6.3 12.5 25 50 100 200  0 *(0.05) (0.09) (0.19) (0.4) (0.8) (1.5) (3) (6) (12)* | 0 0.8 1.6 3.1 6.3 12.5 25 50 100 200  0 *(0.05) (0.09) (0.19) (0.4) (0.8) (1.5) (3) (6) (12)* |
| [Cu(NH3)4]2+@SiO2 (5.5%) | 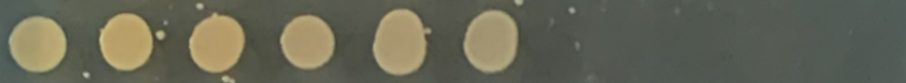 | 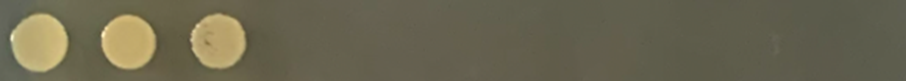 |
| [Cu(NH3)4]2+@SiO2 (5.5%)  24h leached | 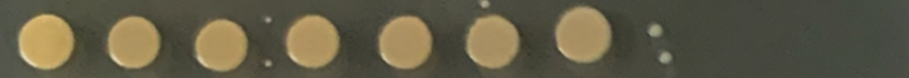 | 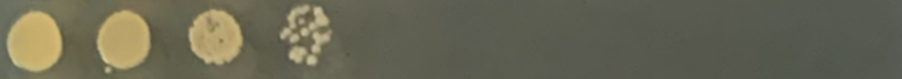 |
|  | 0 0.8 1.6 3.1 6.3 12.5 25 50 100 200  0 *(0.05) (0.1) (0.2) (0.4) (0.8) (1.6) (3.2) (6.4) (12.8)* | 0 0.8 1.6 3.1 6.3 12.5 25 50 100 200  0 *(0.05) (0.1) (0.2) (0.4) (0.8) (1.6) (3.2) (6.4) (12.8)* |
| CuxO@SiO2  (5.5%) | 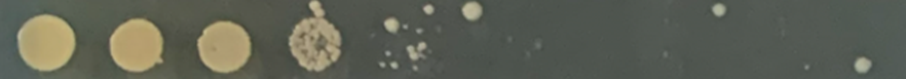 | 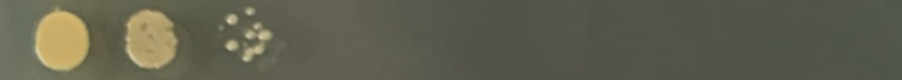 |
| CuxO@SiO2  (5.5%)  24h leached | 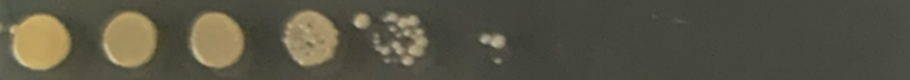 | 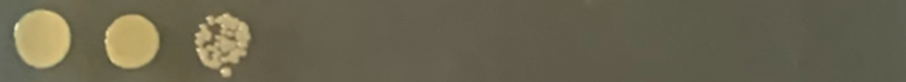 |
|  | 0 3.1 6.3 12.5 25 50 100 200 | 0 3.1 6.3 12.5 25 50 100 200 |
| SiO2 as prepared | 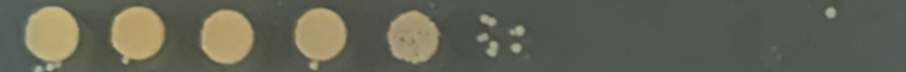 | 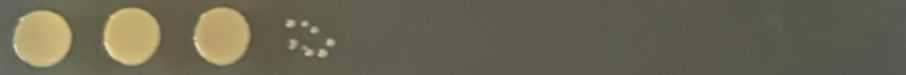 |
|  | 0 3.1 6.3 12.5 25 50 100 200 | 0 3.1 6.3 12.5 25 50 100 200 |
| SiO2 calcined | 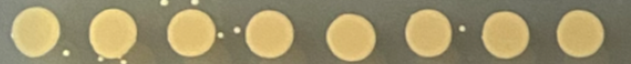 | 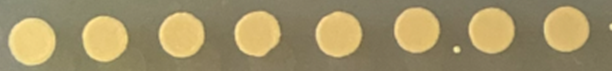 |
|  | 0 0.1 0.5 1.0 2.5 5 10 | 0 0.1 0.5 1.0 2.5 5 10 |
| CTAB | 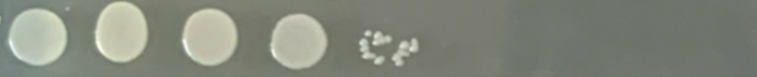 | 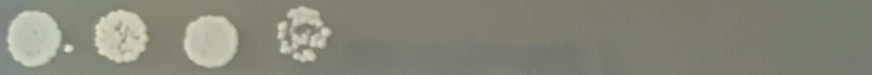 |
|  | 0 0.20 0.4 1.0 2.0 3.9 9.8 19.6 39.3  0 *(0.05) (0.1) (0.25) (0.5) (1.0) (2.5) (5.0) (10)* | 0 0.20 0.4 1.0 2.0 3.9 9.8 19.6 39.3  0 *(0.05) (0.1) (0.25) (0.5) (1.0) (2.5) (5.0) (10)* |
| CuSO4·5H2O | 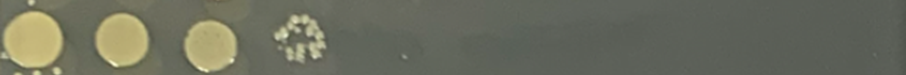 | 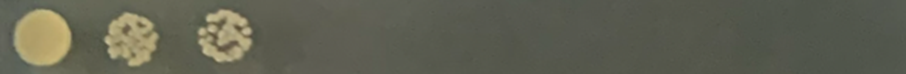 |

| **Compound or material** | ***C. albicans* ATCC 10231: 4-h**  **Concentrations: µg compound/mL *(µg Cu/mL)*** | ***C. albicans* ATCC 10231: 24-h**  **Concentrations: µg compound/mL *(µg Cu/mL)*** |
| --- | --- | --- |
|  | 0 7.8 15.6 31.3 62.5 125 250 500  0  *(0.5) (0.9) (1.8) (3.6) (7.3) (15) (29)* | 0 7.8 15.6 31.3 62.5 125 250 500  0  *(0.5) (0.9) (1.8) (3.6) (7.3) (15) (29)* |
| [Cu(NH3)4]2+@SiO2 (5.5%) | 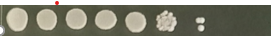 | 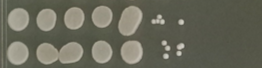 |
|  | 0 7.8 15.6 31.3 62.5 125 250 500  0  *(0.5) (0.9) (1.9) (3.8) (7.5) (15) (30)* | 0 7.8 15.6 31.3 62.5 125 250 500  0  *(0.5) (0.9) (1.9) (3.8) (7.5) (15) (30)* |
| CuxO@SiO2  (5.5%) | 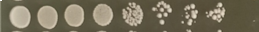 | 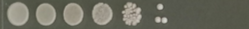 |
|  | 0 7.8 15.6 31.3 62.5 125 250 500 | 0 7.8 15.6 31.3 62.5 125 250 500 |
| SiO2 as prepared | 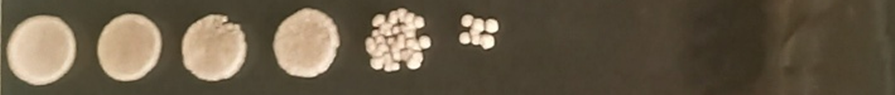 | 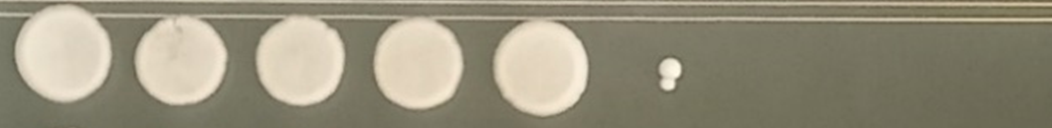 |
|  | 0 7.8 15.6 31.3 62.5 125 250 500 | 0 7.8 15.6 31.3 62.5 125 250 500 |
| SiO2 calcined | 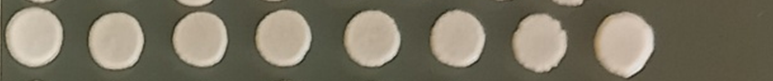 | 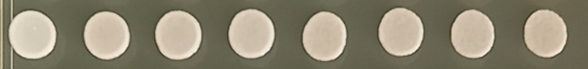 |
|  | 0 3.9 7.8 15.6 31.3 62.5 125 250 | 0 3.9 7.8 15.6 31.3 62.5 125 250 |
| CTAB | 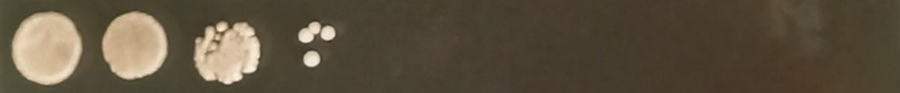 | 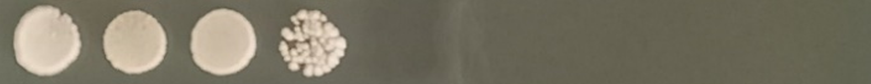 |
|  | 0 2.5 4.9 9.8 20 39 79 157  0 (0.6) (1.3) (2.5) (5) (10) (20) (40) | 0 2.5 4.9 9.8 20 39 79 157  0 (0.6) (1.3) (2.5) (5) (10) (20) (40) |
| CuSO4·5H2O | 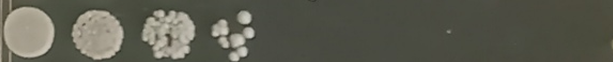 | 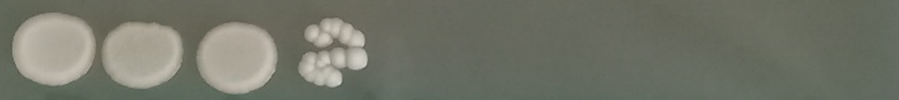 |

| **Compound or material** | ***C. auris* ATCC MYA 5001: 4-h**  **Concentrations: µg compound/mL *(µg Cu/mL)*** | ***C. auris* ATCC MYA 5001: 24-h**  **Concentrations: µg compound/mL *(µg Cu/mL)*** |
| --- | --- | --- |
|  | 0 7.8 15.6 31.3 62.5 125 250 500  0  *(0.5) (0.9) (1.8) (3.6) (7.3) (15) (29)* | 0 7.8 15.6 31.3 62.5 125 250 500  0  *(0.5) (0.9) (1.8) (3.6) (7.3) (15) (29)* |
| [Cu(NH3)4]2+@SiO2 (5.5%) | 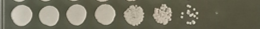 | 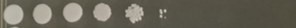 |
|  | 0 7.8 15.6 31.3 62.5 125 250 500  0  *(0.5) (0.9) (1.9) (3.8) (7.5) (15) (30)* | 0 7.8 15.6 31.3 62.5 125 250 500  0  *(0.5) (0.9) (1.9) (3.8) (7.5) (15) (30)* |
| CuxO@SiO2  (5.5%) | 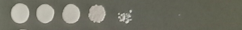 | 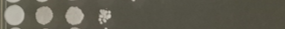 |
|  | 0 7.8 15.6 31.3 62.5 125 250 500 | 0 7.8 15.6 31.3 62.5 125 250 500 |
| SiO2 as prepared | 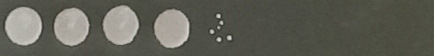 | 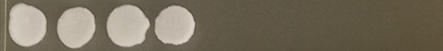 |
|  | 0 7.8 15.6 31.3 62.5 125 250 500 | 0 7.8 15.6 31.3 62.5 125 250 500 |
| SiO2 calcined | 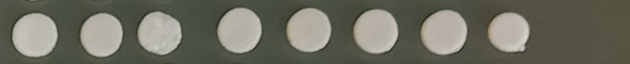 | 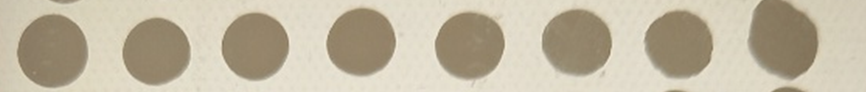 |
|  | 0 1.0 1.95 3.9 7.8 15.6 31.3 62.5 | 0 1.0 1.95 3.9 7.8 15.6 31.3 62.5 |
| CTAB | 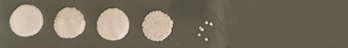 | 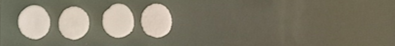 |
|  | 0 2.5 4.9 9.8 20 39 79 157  0 (0.6) (1.3) (2.5) (5) (10) (20) (40) | 0 2.5 4.9 9.8 20 39 79 157  0 (0.6) (1.3) (2.5) (5) (10) (20) (40) |
| CuSO4·5H2O | 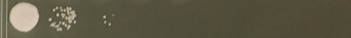 | 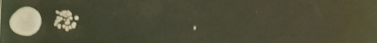 |
