# Supplementary material
Source: Research Square preprint supplement (doi:10.21203/rs.3.rs-9497970/v1)
Supplement: Supplementary file 2 [file 3d430c411b58ed52813d368c.pdf]

## **Uniform volumetric encapsulation of antimicrobial agents into mesoporous silica for their slow release: the case of copper oxide**

Aadil Shafi Bhat<sup>1</sup>, Mariliis Sihtmäe<sup>2</sup>, Kaja Kasemets<sup>2</sup>, Mati Kook<sup>1</sup>, Jekaterina Kozlova<sup>1</sup>, Hugo Mändar<sup>1</sup>, Alexandra Nefedova<sup>1</sup>, Gunnar Nurk<sup>3</sup>, Angela Ivask<sup>4</sup>, Vambola Kisand<sup>1</sup>, Alexander Vanetsev<sup>1\*</sup>

<sup>1</sup> Institute of Physics, University of Tartu, W. Ostwaldi 1, 50411 Tartu, Estonia

<sup>2</sup> National Institute of Chemical Physics and Biophysics, Akadeemia tee 23, 12618, Tallinn, Estonia

<sup>3</sup> Institute of Chemistry, University of Tartu, Ravila tn 14A, 50411 Tartu, Estonia

<sup>4</sup> Institute of Molecular and Cell Biology, University of Tartu, Riia 23, 51010 Tartu, Estonia

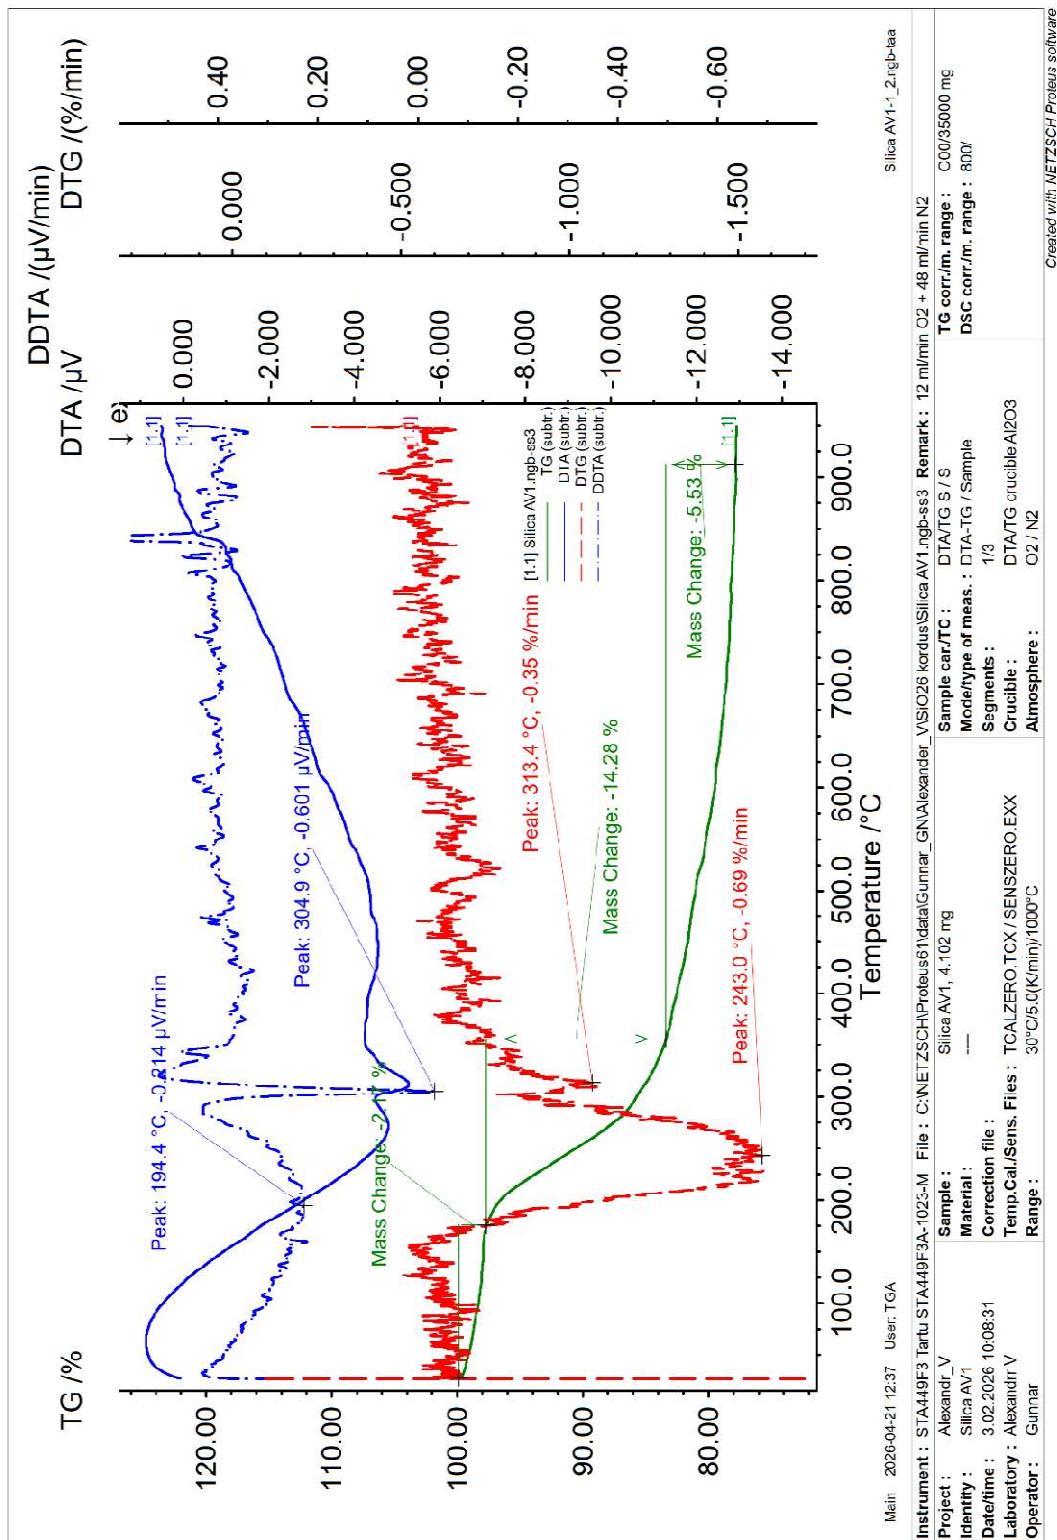

Mein: 2026-04-21 12:37 User: TGA  
 Instrument: STA449F3 Tartu STA449F3A-1025-M File: C:\NETZSCH\Proteus61\data\Gunnar\_GNA\Alexander\_VISO26\_kordus\Silica AV1.npb-ss3 Remark: 12 ml/min O2 + 48 ml/min N2  
 Project: Alexander\_V Sample: Silica AV1, 4,102 mg  
 Identity: Silica AV1 Material: ---  
 Date/time: 3.02.2026 10:08:31 Correction file:  
 Laboratory: Alexander V Temp.Cal./Sens. Files: TCALZERO.TCX / SENSZERO.EXX  
 Operator: Gunnar Range: 30°C/5.0(K/min)/1000°C  
 Sample car/TG: DTA/TG S7 S TG corr./m. range: C00/35000 mg  
 Mode/type of meas.: DTA-TG / Sample DSC corr./m. range: 800Y  
 Segments: 1/3  
 Crucible: DTA/TG crucibleAl2O3  
 Atmosphere: O2 / N2  
 Silica AV1\_1\_2.npb-ss3  
 Created with: NETZSCH Proteus software

Figure S1. DT/TGA of as prepared SiO<sub>2</sub> sample.

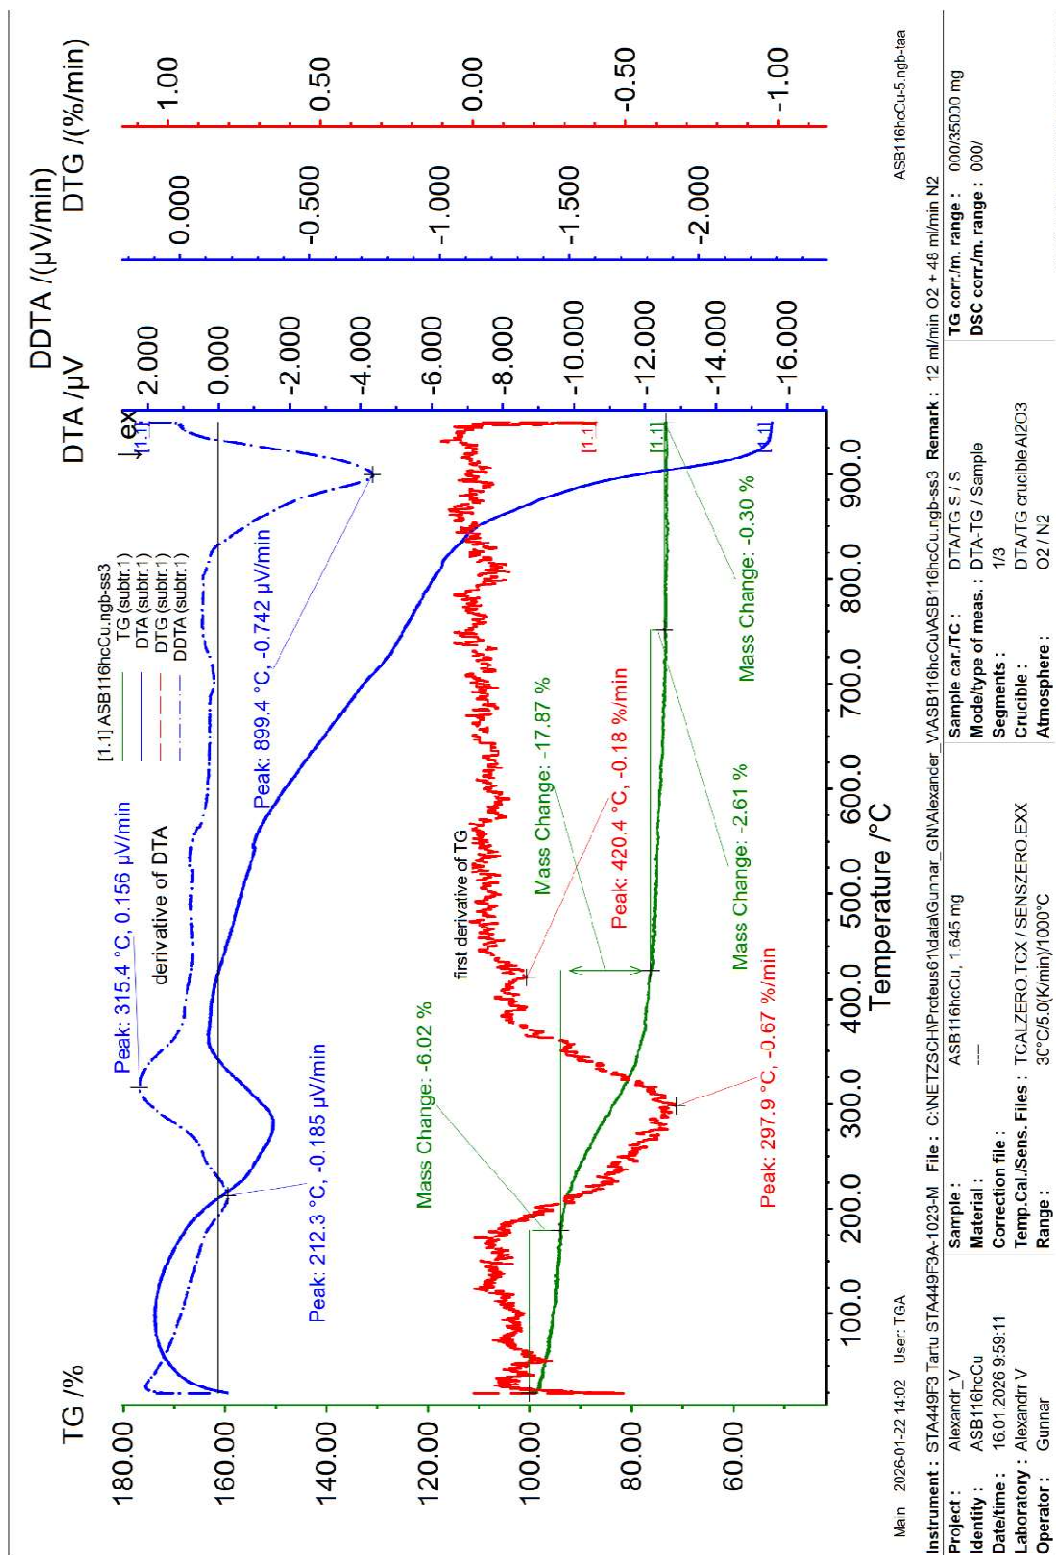

Figure S2. DT/TGA of  $[\text{Cu}(\text{NH}_3)_4]^{2+}@\text{SiO}_2$  (5.5%) sample.

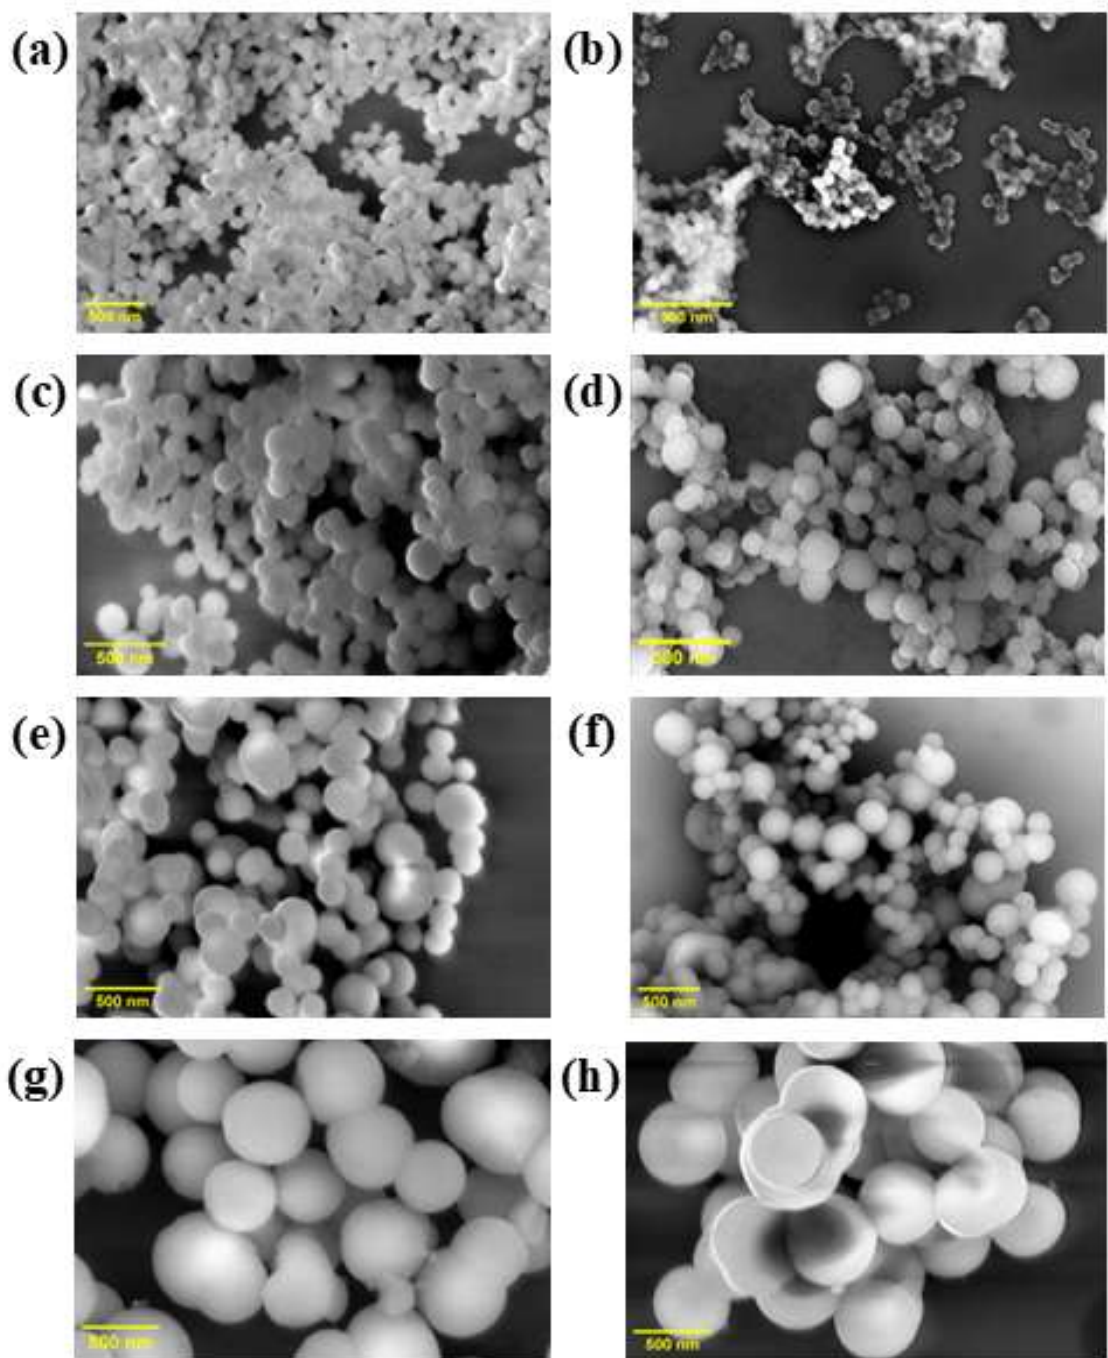

**Figure S3.** Scanning electron microscopy images of SiO<sub>2</sub> (a) and calcined SiO<sub>2</sub> (b); [Cu(NH<sub>3</sub>)<sub>4</sub>]<sup>2+</sup>@SiO<sub>2</sub> (1.5%) (c) and Cu<sub>x</sub>O@SiO<sub>2</sub> (1.5%) (d); [Cu(NH<sub>3</sub>)<sub>4</sub>]<sup>2+</sup>@SiO<sub>2</sub> (3%) (e) and Cu<sub>x</sub>O@SiO<sub>2</sub> (3%) (f); and [Cu(NH<sub>3</sub>)<sub>4</sub>]<sup>2+</sup>@SiO<sub>2</sub> (5.5%) (g) and Cu<sub>x</sub>O@SiO<sub>2</sub> (5.5%) (h). Scale bars = 500 nm.

**Table S1.** Colony-forming ability of bacteria and yeast after 4-h and 24-h exposure to nanocomposites and respective positive controls (CTAB and CuSO<sub>4</sub>·5H<sub>2</sub>O) to bacteria and yeast in deionized water at 30°C. After exposure, cells (3 μL) were transferred onto toxicant-free agarized growth medium. All experiments were performed in at least three independent replicates; images shown are representative.

| Compound or material                                                                       | <i>E. coli</i> ATCC 25922: 4-h            |        |        |        |       |       |       |       |       |        | <i>E. coli</i> ATCC 25922: 24-h           |        |        |        |       |       |       |       |       |        |
|--------------------------------------------------------------------------------------------|-------------------------------------------|--------|--------|--------|-------|-------|-------|-------|-------|--------|-------------------------------------------|--------|--------|--------|-------|-------|-------|-------|-------|--------|
|                                                                                            | Concentrations: μg compound/mL (μg Cu/mL) |        |        |        |       |       |       |       |       |        | Concentrations: μg compound/mL (μg Cu/mL) |        |        |        |       |       |       |       |       |        |
|                                                                                            | 0                                         | 0.8    | 1.6    | 3.1    | 6.3   | 12.5  | 25    | 50    | 100   | 200    | 0                                         | 0.8    | 1.6    | 3.1    | 6.3   | 12.5  | 25    | 50    | 100   | 200    |
|                                                                                            | 0                                         | (0.05) | (0.09) | (0.19) | (0.4) | (0.8) | (1.5) | (3)   | (6)   | (12)   | 0                                         | (0.05) | (0.09) | (0.19) | (0.4) | (0.8) | (1.5) | (3)   | (6)   | (12)   |
| [Cu(NH <sub>3</sub> ) <sub>4</sub> ] <sup>2+</sup> @SiO <sub>2</sub> (5.5%)                |                                           |        |        |        |       |       |       |       |       |        |                                           |        |        |        |       |       |       |       |       |        |
| [Cu(NH <sub>3</sub> ) <sub>4</sub> ] <sup>2+</sup> @SiO <sub>2</sub> (5.5%)<br>24h leached |                                           |        |        |        |       |       |       |       |       |        |                                           |        |        |        |       |       |       |       |       |        |
|                                                                                            | 0                                         | 0.8    | 1.6    | 3.1    | 6.3   | 12.5  | 25    | 50    | 100   | 200    | 0                                         | 0.8    | 1.6    | 3.1    | 6.3   | 12.5  | 25    | 50    | 100   | 200    |
|                                                                                            | 0                                         | (0.05) | (0.1)  | (0.2)  | (0.4) | (0.8) | (1.6) | (3.2) | (6.4) | (12.8) | 0                                         | (0.05) | (0.1)  | (0.2)  | (0.4) | (0.8) | (1.6) | (3.2) | (6.4) | (12.8) |
| Cu <sub>x</sub> O@SiO <sub>2</sub> (5.5%)                                                  |                                           |        |        |        |       |       |       |       |       |        |                                           |        |        |        |       |       |       |       |       |        |
| Cu <sub>x</sub> O@SiO <sub>2</sub> (5.5%)<br>24h leached                                   |                                           |        |        |        |       |       |       |       |       |        |                                           |        |        |        |       |       |       |       |       |        |
|                                                                                            | 0                                         | 3.1    | 6.3    | 12.5   | 25    | 50    | 100   | 200   | 0     | 3.1    | 6.3                                       | 12.5   | 25     | 50     | 100   | 200   |       |       |       |        |
| SiO <sub>2</sub> , as prepared                                                             |                                           |        |        |        |       |       |       |       |       |        |                                           |        |        |        |       |       |       |       |       |        |
|                                                                                            | 0                                         | 3.1    | 6.3    | 12.5   | 25    | 50    | 100   | 200   | 0     | 3.1    | 6.3                                       | 12.5   | 25     | 50     | 100   | 200   |       |       |       |        |
| SiO <sub>2</sub> , calcined                                                                |                                           |        |        |        |       |       |       |       |       |        |                                           |        |        |        |       |       |       |       |       |        |
|                                                                                            | 0                                         | 0.1    | 0.5    | 1.0    | 2.5   | 5     | 10    | 0     | 0.1   | 0.5    | 1.0                                       | 2.5    | 5      | 10     |       |       |       |       |       |        |
| CTAB                                                                                       |                                           |        |        |        |       |       |       |       |       |        |                                           |        |        |        |       |       |       |       |       |        |
|                                                                                            | 0                                         | 0.20   | 0.4    | 1.0    | 2.0   | 3.9   | 9.8   | 19.6  | 39.3  | 0      | 0.20                                      | 0.4    | 1.0    | 2.0    | 3.9   | 9.8   | 19.6  | 39.3  |       |        |
|                                                                                            | 0                                         | (0.05) | (0.1)  | (0.25) | (0.5) | (1.0) | (2.5) | (5.0) | (10)  | 0      | (0.05)                                    | (0.1)  | (0.25) | (0.5)  | (1.0) | (2.5) | (5.0) | (10)  |       |        |
| CuSO <sub>4</sub> ·5H <sub>2</sub> O                                                       |                                           |        |        |        |       |       |       |       |       |        |                                           |        |        |        |       |       |       |       |       |        |

| Compound or material                                                                          | <i>P. aeruginosa</i> ATCC 27853: 4-h                             |        |        |        |       |       |       |       |       |        |        | <i>P. aeruginosa</i> ATCC 27853: 24-h                            |        |        |       |       |       |       |       |        |  |  |
|-----------------------------------------------------------------------------------------------|------------------------------------------------------------------|--------|--------|--------|-------|-------|-------|-------|-------|--------|--------|------------------------------------------------------------------|--------|--------|-------|-------|-------|-------|-------|--------|--|--|
|                                                                                               | Concentrations: $\mu\text{g}$ compound/mL ( $\mu\text{g}$ Cu/mL) |        |        |        |       |       |       |       |       |        |        | Concentrations: $\mu\text{g}$ compound/mL ( $\mu\text{g}$ Cu/mL) |        |        |       |       |       |       |       |        |  |  |
|                                                                                               | 0                                                                | 0.8    | 1.6    | 3.1    | 6.3   | 12.5  | 25    | 50    | 100   | 200    | 0      | 0.8                                                              | 1.6    | 3.1    | 6.3   | 12.5  | 25    | 50    | 100   | 200    |  |  |
|                                                                                               | 0                                                                | (0.05) | (0.09) | (0.19) | (0.4) | (0.8) | (1.5) | (3)   | (6)   | (12)   | 0      | (0.05)                                                           | (0.09) | (0.19) | (0.4) | (0.8) | (1.5) | (3)   | (6)   | (12)   |  |  |
| [Cu(NH <sub>3</sub> ) <sub>4</sub> ] <sup>2+</sup> @SiO <sub>2</sub><br>(5.5%)                |                                                                  |        |        |        |       |       |       |       |       |        |        |                                                                  |        |        |       |       |       |       |       |        |  |  |
| [Cu(NH <sub>3</sub> ) <sub>4</sub> ] <sup>2+</sup> @SiO <sub>2</sub><br>(5.5%)<br>24h leached |                                                                  |        |        |        |       |       |       |       |       |        |        |                                                                  |        |        |       |       |       |       |       |        |  |  |
|                                                                                               | 0                                                                | 0.8    | 1.6    | 3.1    | 6.3   | 12.5  | 25    | 50    | 100   | 200    | 0      | 0.8                                                              | 1.6    | 3.1    | 6.3   | 12.5  | 25    | 50    | 100   | 200    |  |  |
|                                                                                               | 0                                                                | (0.05) | (0.1)  | (0.2)  | (0.4) | (0.8) | (1.6) | (3.2) | (6.4) | (12.8) | 0      | (0.05)                                                           | (0.1)  | (0.2)  | (0.4) | (0.8) | (1.6) | (3.2) | (6.4) | (12.8) |  |  |
| Cu <sub>x</sub> O@SiO <sub>2</sub><br>(5.5%)                                                  |                                                                  |        |        |        |       |       |       |       |       |        |        |                                                                  |        |        |       |       |       |       |       |        |  |  |
| Cu <sub>x</sub> O@SiO <sub>2</sub><br>(5.5%)<br>24h leached                                   |                                                                  |        |        |        |       |       |       |       |       |        |        |                                                                  |        |        |       |       |       |       |       |        |  |  |
|                                                                                               | 0                                                                | 3.1    | 6.3    | 12.5   | 25    | 50    | 100   | 200   | 0     | 3.1    | 6.3    | 12.5                                                             | 25     | 50     | 100   | 200   |       |       |       |        |  |  |
| SiO <sub>2</sub> , as prepared                                                                |                                                                  |        |        |        |       |       |       |       |       |        |        |                                                                  |        |        |       |       |       |       |       |        |  |  |
|                                                                                               | 0                                                                | 3.1    | 6.3    | 12.5   | 25    | 50    | 100   | 200   | 0     | 3.1    | 6.3    | 12.5                                                             | 25     | 50     | 100   | 200   |       |       |       |        |  |  |
| SiO <sub>2</sub> , calcined                                                                   |                                                                  |        |        |        |       |       |       |       |       |        |        |                                                                  |        |        |       |       |       |       |       |        |  |  |
|                                                                                               | 0                                                                | 0.1    | 0.5    | 1.0    | 2.5   | 5     | 10    | 0     | 0.1   | 0.5    | 1.0    | 2.5                                                              | 5      | 10     |       |       |       |       |       |        |  |  |
| CTAB                                                                                          |                                                                  |        |        |        |       |       |       |       |       |        |        |                                                                  |        |        |       |       |       |       |       |        |  |  |
|                                                                                               | 0                                                                | 0.20   | 0.4    | 1.0    | 2.0   | 3.9   | 9.8   | 19.6  | 39.3  | 0      | 0.20   | 0.4                                                              | 1.0    | 2.0    | 3.9   | 9.8   | 19.6  | 39.3  |       |        |  |  |
|                                                                                               | 0                                                                | (0.05) | (0.1)  | (0.25) | (0.5) | (1.0) | (2.5) | (5.0) | (10)  | 0      | (0.05) | (0.1)                                                            | (0.25) | (0.5)  | (1.0) | (2.5) | (5.0) | (10)  |       |        |  |  |
| CuSO <sub>4</sub> ·5H <sub>2</sub> O                                                          |                                                                  |        |        |        |       |       |       |       |       |        |        |                                                                  |        |        |       |       |       |       |       |        |  |  |

| Compound or material                                                                          | <i>S. aureus</i> ATCC 6538: 4-h                                  |        |        |        |       |       |       |       |       |        | <i>S. aureus</i> ATCC 6538: 24-h                                 |        |        |        |       |       |       |       |       |        |
|-----------------------------------------------------------------------------------------------|------------------------------------------------------------------|--------|--------|--------|-------|-------|-------|-------|-------|--------|------------------------------------------------------------------|--------|--------|--------|-------|-------|-------|-------|-------|--------|
|                                                                                               | Concentrations: $\mu\text{g}$ compound/mL ( $\mu\text{g}$ Cu/mL) |        |        |        |       |       |       |       |       |        | Concentrations: $\mu\text{g}$ compound/mL ( $\mu\text{g}$ Cu/mL) |        |        |        |       |       |       |       |       |        |
|                                                                                               | 0                                                                | 0.8    | 1.6    | 3.1    | 6.3   | 12.5  | 25    | 50    | 100   | 200    | 0                                                                | 0.8    | 1.6    | 3.1    | 6.3   | 12.5  | 25    | 50    | 100   | 200    |
|                                                                                               | 0                                                                | (0.05) | (0.09) | (0.19) | (0.4) | (0.8) | (1.5) | (3)   | (6)   | (12)   | 0                                                                | (0.05) | (0.09) | (0.19) | (0.4) | (0.8) | (1.5) | (3)   | (6)   | (12)   |
| [Cu(NH <sub>3</sub> ) <sub>4</sub> ] <sup>2+</sup> @SiO <sub>2</sub><br>(5.5%)                |                                                                  |        |        |        |       |       |       |       |       |        |                                                                  |        |        |        |       |       |       |       |       |        |
| [Cu(NH <sub>3</sub> ) <sub>4</sub> ] <sup>2+</sup> @SiO <sub>2</sub><br>(5.5%)<br>24h leached |                                                                  |        |        |        |       |       |       |       |       |        |                                                                  |        |        |        |       |       |       |       |       |        |
|                                                                                               | 0                                                                | 0.8    | 1.6    | 3.1    | 6.3   | 12.5  | 25    | 50    | 100   | 200    | 0                                                                | 0.8    | 1.6    | 3.1    | 6.3   | 12.5  | 25    | 50    | 100   | 200    |
|                                                                                               | 0                                                                | (0.05) | (0.1)  | (0.2)  | (0.4) | (0.8) | (1.6) | (3.2) | (6.4) | (12.8) | 0                                                                | (0.05) | (0.1)  | (0.2)  | (0.4) | (0.8) | (1.6) | (3.2) | (6.4) | (12.8) |
| Cu <sub>x</sub> O@SiO <sub>2</sub><br>(5.5%)                                                  |                                                                  |        |        |        |       |       |       |       |       |        |                                                                  |        |        |        |       |       |       |       |       |        |
| Cu <sub>x</sub> O@SiO <sub>2</sub><br>(5.5%)<br>24h leached                                   |                                                                  |        |        |        |       |       |       |       |       |        |                                                                  |        |        |        |       |       |       |       |       |        |
|                                                                                               | 0                                                                | 3.1    | 6.3    | 12.5   | 25    | 50    | 100   | 200   | 0     | 3.1    | 6.3                                                              | 12.5   | 25     | 50     | 100   | 200   |       |       |       |        |
| SiO <sub>2</sub> , as prepared                                                                |                                                                  |        |        |        |       |       |       |       |       |        |                                                                  |        |        |        |       |       |       |       |       |        |
|                                                                                               | 0                                                                | 3.1    | 6.3    | 12.5   | 25    | 50    | 100   | 200   | 0     | 3.1    | 6.3                                                              | 12.5   | 25     | 50     | 100   | 200   |       |       |       |        |
| SiO <sub>2</sub> , calcined                                                                   |                                                                  |        |        |        |       |       |       |       |       |        |                                                                  |        |        |        |       |       |       |       |       |        |
|                                                                                               | 0                                                                | 0.1    | 0.5    | 1.0    | 2.5   | 5     | 10    | 0     | 0.1   | 0.5    | 1.0                                                              | 2.5    | 5      | 10     |       |       |       |       |       |        |
| CTAB                                                                                          |                                                                  |        |        |        |       |       |       |       |       |        |                                                                  |        |        |        |       |       |       |       |       |        |
|                                                                                               | 0                                                                | 0.20   | 0.4    | 1.0    | 2.0   | 3.9   | 9.8   | 19.6  | 39.3  | 0      | 0.20                                                             | 0.4    | 1.0    | 2.0    | 3.9   | 9.8   | 19.6  | 39.3  |       |        |
|                                                                                               | 0                                                                | (0.05) | (0.1)  | (0.25) | (0.5) | (1.0) | (2.5) | (5.0) | (10)  | 0      | (0.05)                                                           | (0.1)  | (0.25) | (0.5)  | (1.0) | (2.5) | (5.0) | (10)  |       |        |
| CuSO <sub>4</sub> ·5H <sub>2</sub> O                                                          |                                                                  |        |        |        |       |       |       |       |       |        |                                                                  |        |        |        |       |       |       |       |       |        |

| Compound or material                                                           | <i>C. albicans</i> ATCC 10231: 4-h<br>Concentrations: $\mu\text{g}$ compound/mL ( $\mu\text{g}$ Cu/mL) |       |       |       |       |       |      |      | <i>C. albicans</i> ATCC 10231: 24-h<br>Concentrations: $\mu\text{g}$ compound/mL ( $\mu\text{g}$ Cu/mL) |       |       |       |       |       |      |      |   |       |       |       |       |       |      |      |   |       |       |       |       |       |      |      |
|--------------------------------------------------------------------------------|--------------------------------------------------------------------------------------------------------|-------|-------|-------|-------|-------|------|------|---------------------------------------------------------------------------------------------------------|-------|-------|-------|-------|-------|------|------|---|-------|-------|-------|-------|-------|------|------|---|-------|-------|-------|-------|-------|------|------|
| [Cu(NH <sub>3</sub> ) <sub>4</sub> ] <sup>2+</sup> @SiO <sub>2</sub><br>(5.5%) | 0                                                                                                      | 7.8   | 15.6  | 31.3  | 62.5  | 125   | 250  | 500  | 0                                                                                                       | 7.8   | 15.6  | 31.3  | 62.5  | 125   | 250  | 500  | 0 | 7.8   | 15.6  | 31.3  | 62.5  | 125   | 250  | 500  | 0 | 7.8   | 15.6  | 31.3  | 62.5  | 125   | 250  | 500  |
|                                                                                | 0                                                                                                      | (0.5) | (0.9) | (1.8) | (3.6) | (7.3) | (15) | (29) | 0                                                                                                       | (0.5) | (0.9) | (1.8) | (3.6) | (7.3) | (15) | (29) | 0 | (0.5) | (0.9) | (1.8) | (3.6) | (7.3) | (15) | (29) | 0 | (0.5) | (0.9) | (1.8) | (3.6) | (7.3) | (15) | (29) |
| Cu <sub>x</sub> O@SiO <sub>2</sub><br>(5.5%)                                   | 0                                                                                                      | 7.8   | 15.6  | 31.3  | 62.5  | 125   | 250  | 500  | 0                                                                                                       | 7.8   | 15.6  | 31.3  | 62.5  | 125   | 250  | 500  | 0 | 7.8   | 15.6  | 31.3  | 62.5  | 125   | 250  | 500  | 0 | 7.8   | 15.6  | 31.3  | 62.5  | 125   | 250  | 500  |
|                                                                                | 0                                                                                                      | (0.5) | (0.9) | (1.9) | (3.8) | (7.5) | (15) | (30) | 0                                                                                                       | (0.5) | (0.9) | (1.9) | (3.8) | (7.5) | (15) | (30) | 0 | (0.5) | (0.9) | (1.9) | (3.8) | (7.5) | (15) | (30) | 0 | (0.5) | (0.9) | (1.9) | (3.8) | (7.5) | (15) | (30) |
| SiO <sub>2</sub> , as prepared                                                 | 0                                                                                                      | 7.8   | 15.6  | 31.3  | 62.5  | 125   | 250  | 500  | 0                                                                                                       | 7.8   | 15.6  | 31.3  | 62.5  | 125   | 250  | 500  | 0 | 7.8   | 15.6  | 31.3  | 62.5  | 125   | 250  | 500  | 0 | 7.8   | 15.6  | 31.3  | 62.5  | 125   | 250  | 500  |
|                                                                                | 0                                                                                                      | 7.8   | 15.6  | 31.3  | 62.5  | 125   | 250  | 500  | 0                                                                                                       | 7.8   | 15.6  | 31.3  | 62.5  | 125   | 250  | 500  | 0 | 7.8   | 15.6  | 31.3  | 62.5  | 125   | 250  | 500  | 0 | 7.8   | 15.6  | 31.3  | 62.5  | 125   | 250  | 500  |
| SiO <sub>2</sub> , calcined                                                    | 0                                                                                                      | 7.8   | 15.6  | 31.3  | 62.5  | 125   | 250  | 500  | 0                                                                                                       | 7.8   | 15.6  | 31.3  | 62.5  | 125   | 250  | 500  | 0 | 7.8   | 15.6  | 31.3  | 62.5  | 125   | 250  | 500  | 0 | 7.8   | 15.6  | 31.3  | 62.5  | 125   | 250  | 500  |
|                                                                                | 0                                                                                                      | 7.8   | 15.6  | 31.3  | 62.5  | 125   | 250  | 500  | 0                                                                                                       | 7.8   | 15.6  | 31.3  | 62.5  | 125   | 250  | 500  | 0 | 7.8   | 15.6  | 31.3  | 62.5  | 125   | 250  | 500  | 0 | 7.8   | 15.6  | 31.3  | 62.5  | 125   | 250  | 500  |
| CTAB                                                                           | 0                                                                                                      | 3.9   | 7.8   | 15.6  | 31.3  | 62.5  | 125  | 250  | 0                                                                                                       | 3.9   | 7.8   | 15.6  | 31.3  | 62.5  | 125  | 250  | 0 | 3.9   | 7.8   | 15.6  | 31.3  | 62.5  | 125  | 250  | 0 | 3.9   | 7.8   | 15.6  | 31.3  | 62.5  | 125  | 250  |
|                                                                                | 0                                                                                                      | 3.9   | 7.8   | 15.6  | 31.3  | 62.5  | 125  | 250  | 0                                                                                                       | 3.9   | 7.8   | 15.6  | 31.3  | 62.5  | 125  | 250  | 0 | 3.9   | 7.8   | 15.6  | 31.3  | 62.5  | 125  | 250  | 0 | 3.9   | 7.8   | 15.6  | 31.3  | 62.5  | 125  | 250  |
| CuSO <sub>4</sub> ·5H <sub>2</sub> O                                           | 0                                                                                                      | 2.5   | 4.9   | 9.8   | 20    | 39    | 79   | 157  | 0                                                                                                       | 2.5   | 4.9   | 9.8   | 20    | 39    | 79   | 157  | 0 | 2.5   | 4.9   | 9.8   | 20    | 39    | 79   | 157  | 0 | 2.5   | 4.9   | 9.8   | 20    | 39    | 79   | 157  |
|                                                                                | 0                                                                                                      | (0.6) | (1.3) | (2.5) | (5)   | (10)  | (20) | (40) | 0                                                                                                       | (0.6) | (1.3) | (2.5) | (5)   | (10)  | (20) | (40) | 0 | (0.6) | (1.3) | (2.5) | (5)   | (10)  | (20) | (40) | 0 | (0.6) | (1.3) | (2.5) | (5)   | (10)  | (20) | (40) |

| Compound or material                                                           | <i>C. auris</i> ATCC MYA 5001: 4-h<br>Concentrations: $\mu\text{g}$ compound/mL ( $\mu\text{g}$ Cu/mL) |       |       |       |       |       |      |      | <i>C. auris</i> ATCC MYA 5001: 24-h<br>Concentrations: $\mu\text{g}$ compound/mL ( $\mu\text{g}$ Cu/mL) |       |       |       |       |       |      |      |  |
|--------------------------------------------------------------------------------|--------------------------------------------------------------------------------------------------------|-------|-------|-------|-------|-------|------|------|---------------------------------------------------------------------------------------------------------|-------|-------|-------|-------|-------|------|------|--|
| [Cu(NH <sub>3</sub> ) <sub>4</sub> ] <sup>2+</sup> @SiO <sub>2</sub><br>(5.5%) | 0                                                                                                      | 7.8   | 15.6  | 31.3  | 62.5  | 125   | 250  | 500  | 0                                                                                                       | 7.8   | 15.6  | 31.3  | 62.5  | 125   | 250  | 500  |  |
|                                                                                | 0                                                                                                      | (0.5) | (0.9) | (1.8) | (3.6) | (7.3) | (15) | (29) | 0                                                                                                       | (0.5) | (0.9) | (1.8) | (3.6) | (7.3) | (15) | (29) |  |
| Cu <sub>x</sub> O@SiO <sub>2</sub><br>(5.5%)                                   | 0                                                                                                      | 7.8   | 15.6  | 31.3  | 62.5  | 125   | 250  | 500  | 0                                                                                                       | 7.8   | 15.6  | 31.3  | 62.5  | 125   | 250  | 500  |  |
|                                                                                | 0                                                                                                      | (0.5) | (0.9) | (1.9) | (3.8) | (7.5) | (15) | (30) | 0                                                                                                       | (0.5) | (0.9) | (1.9) | (3.8) | (7.5) | (15) | (30) |  |
| SiO <sub>2</sub> , as prepared                                                 | 0                                                                                                      | 7.8   | 15.6  | 31.3  | 62.5  | 125   | 250  | 500  | 0                                                                                                       | 7.8   | 15.6  | 31.3  | 62.5  | 125   | 250  | 500  |  |
|                                                                                | 0                                                                                                      | 7.8   | 15.6  | 31.3  | 62.5  | 125   | 250  | 500  | 0                                                                                                       | 7.8   | 15.6  | 31.3  | 62.5  | 125   | 250  | 500  |  |
| SiO <sub>2</sub> , calcined                                                    | 0                                                                                                      | 7.8   | 15.6  | 31.3  | 62.5  | 125   | 250  | 500  | 0                                                                                                       | 7.8   | 15.6  | 31.3  | 62.5  | 125   | 250  | 500  |  |
|                                                                                | 0                                                                                                      | 7.8   | 15.6  | 31.3  | 62.5  | 125   | 250  | 500  | 0                                                                                                       | 7.8   | 15.6  | 31.3  | 62.5  | 125   | 250  | 500  |  |
| CTAB                                                                           | 0                                                                                                      | 1.0   | 1.95  | 3.9   | 7.8   | 15.6  | 31.3 | 62.5 | 0                                                                                                       | 1.0   | 1.95  | 3.9   | 7.8   | 15.6  | 31.3 | 62.5 |  |
|                                                                                | 0                                                                                                      | 1.0   | 1.95  | 3.9   | 7.8   | 15.6  | 31.3 | 62.5 | 0                                                                                                       | 1.0   | 1.95  | 3.9   | 7.8   | 15.6  | 31.3 | 62.5 |  |
| CuSO <sub>4</sub> ·5H <sub>2</sub> O                                           | 0                                                                                                      | 2.5   | 4.9   | 9.8   | 20    | 39    | 79   | 157  | 0                                                                                                       | 2.5   | 4.9   | 9.8   | 20    | 39    | 79   | 157  |  |
|                                                                                | 0                                                                                                      | (0.6) | (1.3) | (2.5) | (5)   | (10)  | (20) | (40) | 0                                                                                                       | (0.6) | (1.3) | (2.5) | (5)   | (10)  | (20) | (40) |  |
